# Supplementary material
Source: Royal Society of Chemistry journal article supplement (doi:10.1039/d5gc06859b)
Supplement: d5gc06859b1.pdf [file d5gc06859b1.pdf]

## Supplementary Information

### Catalyst-Free Lignin Photothermal Valorization via Preferential Aromatic C-H Cleavage

Zipeng Chen,<sup>a</sup> Yifei Sun,<sup>a</sup> Yunjie Zou,<sup>b</sup> Sanli Tang,<sup>c</sup> Jingjing Tian,<sup>a</sup> Chengliang Mao<sup>\*d</sup> and Zhihui Ai<sup>\*a</sup>

a. Engineering Research Center of Photoenergy Utilization for Pollution Control and Carbon Reduction (Ministry of Education); College of Chemistry, Central China Normal University, Wuhan 430079, P.R. China.

b. State Key Laboratory for Pollution Control and Resource Reuse, College of Environmental Science and Engineering, Tongji University, Shanghai, P.R. China.

c. Institute of Engineering Thermophysics, Chinese Academy of Sciences, Beijing 100190, P.R. China.

d. State Key Laboratory of Green Papermaking and Resource Recycling, Shanghai Engineering Research Center of Solid Waste Treatment and Resource Recovery, National Observation and Research Station of Erhai Lake Ecosystem in Yunnan, Yunnan Dali Research Institute, School of Environmental Science and Engineering, Shanghai Jiao Tong University, Shanghai, P. R. China.

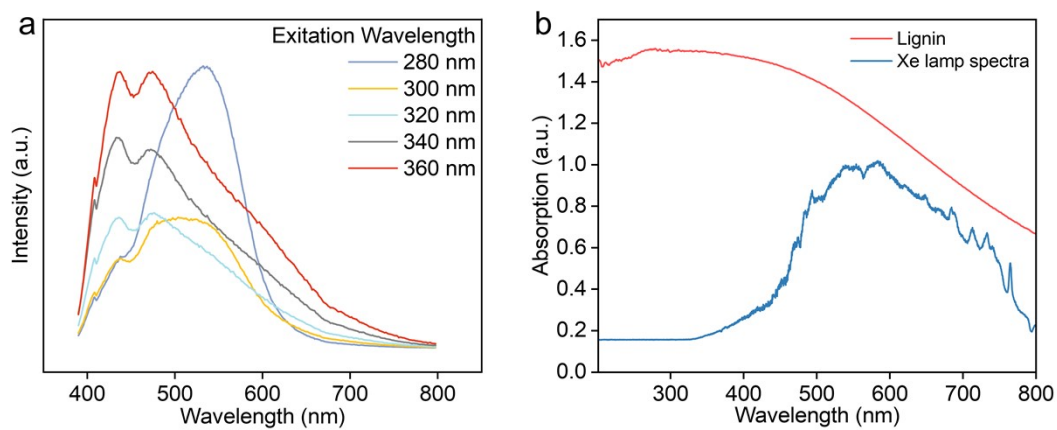

Figure S1. Optical characterization of lignin.

(a) Fluorescence emission spectra of lignin under different excitation wavelengths.

(b) UV-Vis absorption spectrum of lignin and emission spectrum of the Xe lamp.

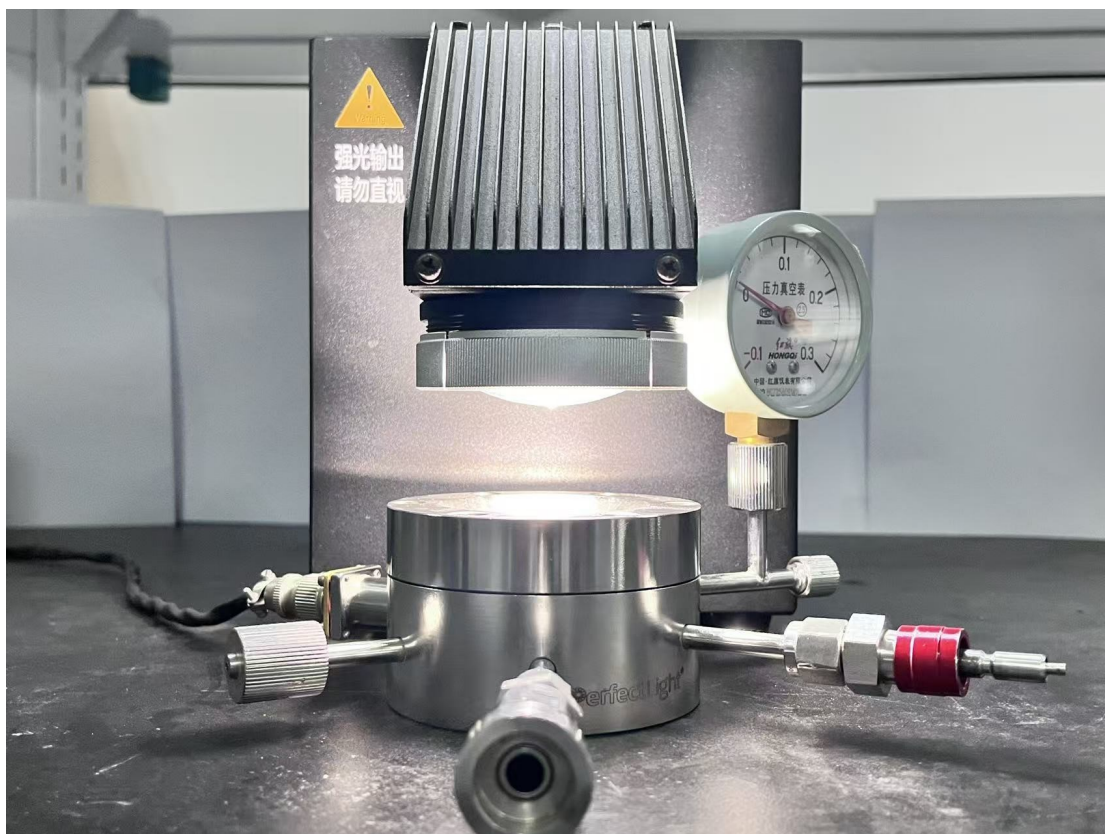

Figure S2. Digital photograph of the lignin photothermal recovery system.

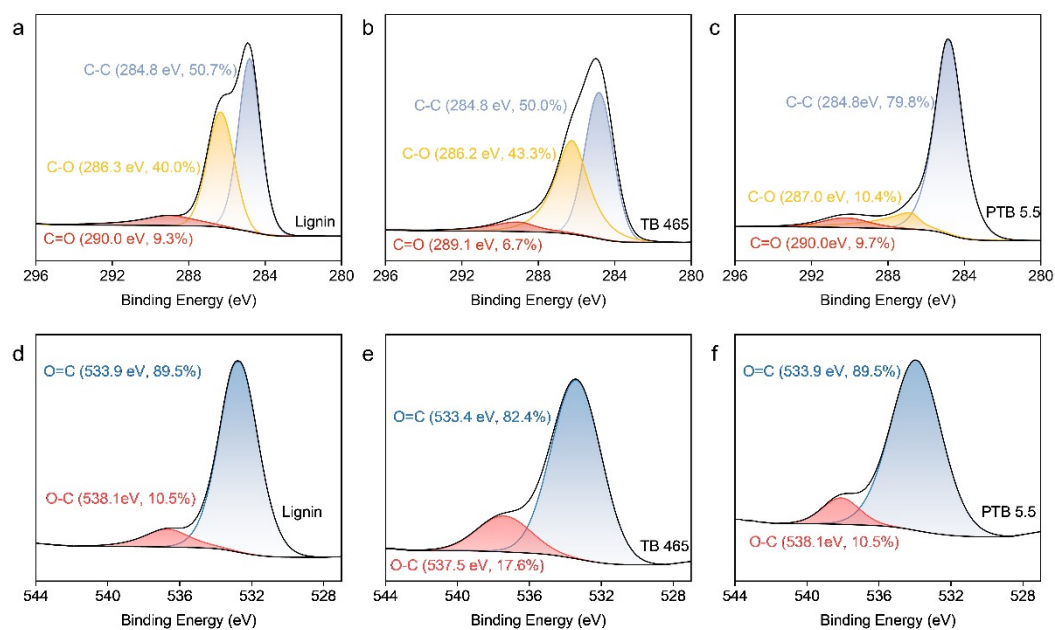

Figure S3. XPS spectra of C1s for (a) lignin, (b) TB 465, and (c) PTB 5.5; XPS spectra of O1s for (d) lignin, (e) TB 465, and (f) PTB 5.5.

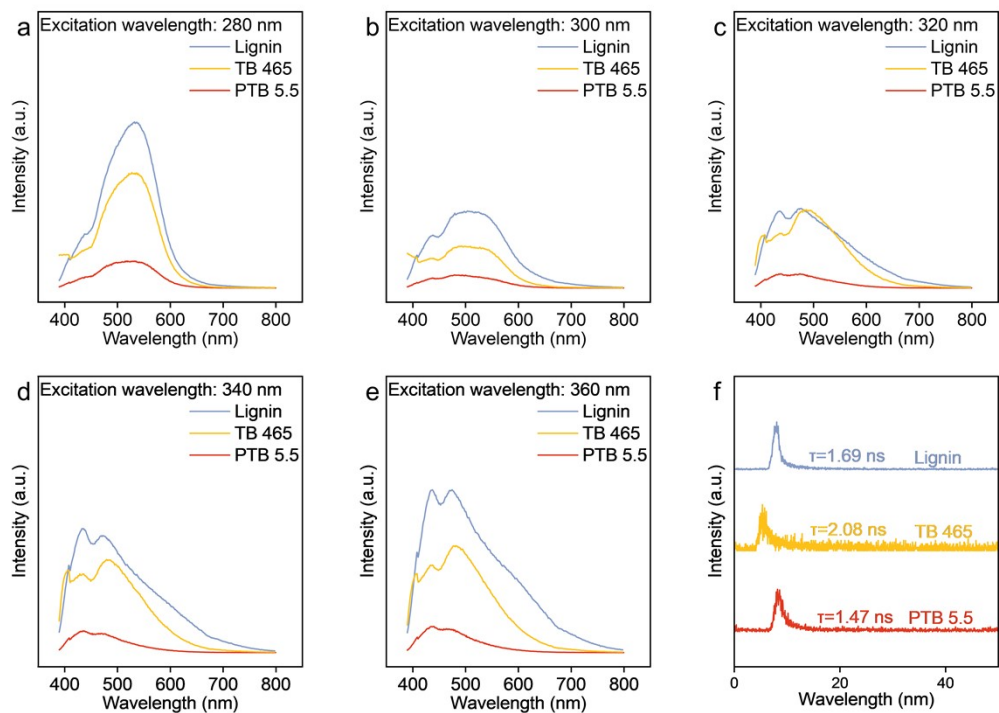

Figure S4. Fluorescence emission spectra and lifetimes of lignin, TB 465, and PTB 5.5. (a–e) Fluorescence emission spectra excited at 280, 300, 320, 340, and 360 nm, respectively; (f) fluorescence lifetime decay curves of the three samples monitored at 430 nm emission.

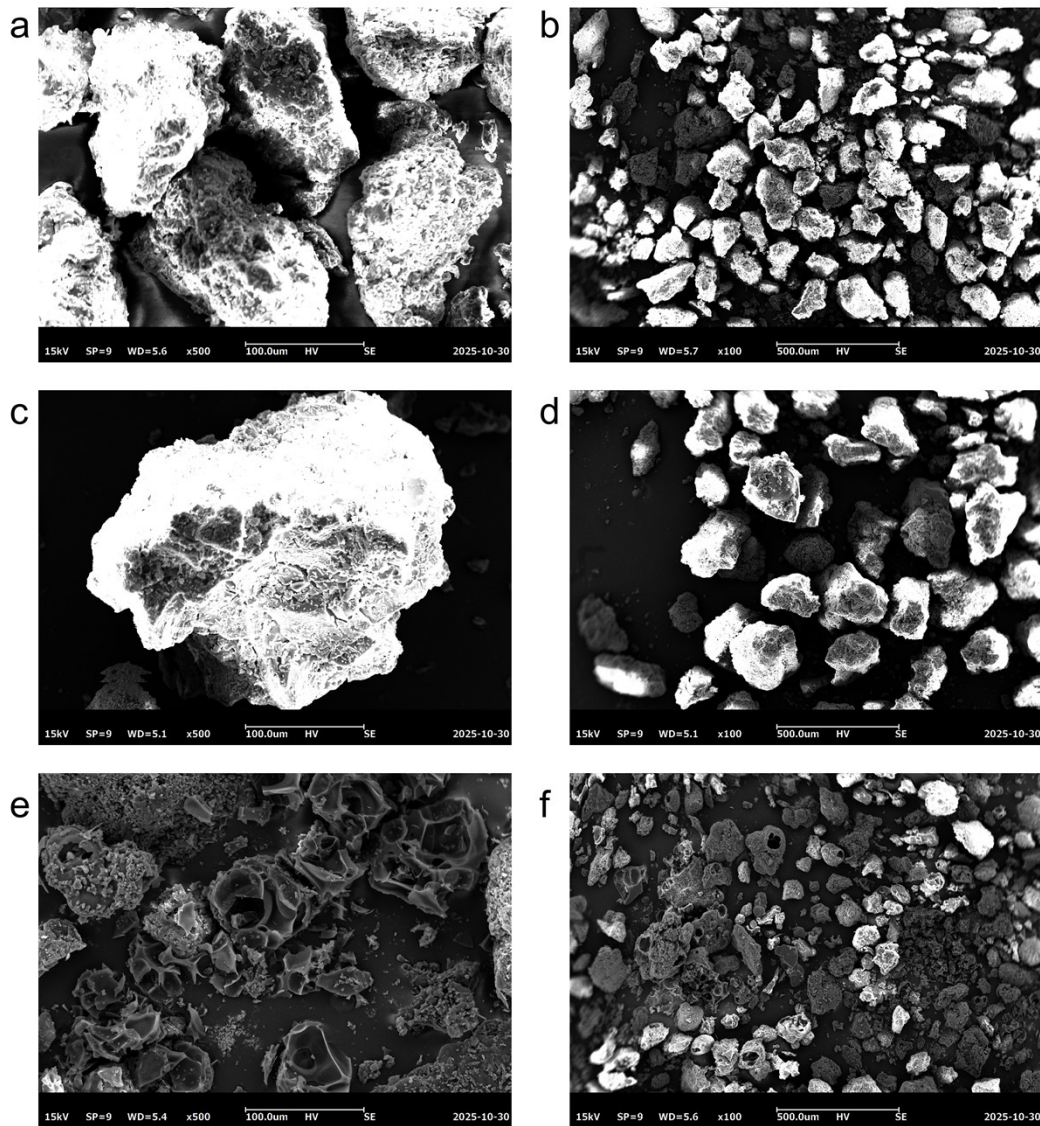

Figure S5. Scanning electron microscopy images of (a, b) lignin, (c, d) TB 465, and (e, f) PTB 5.5.

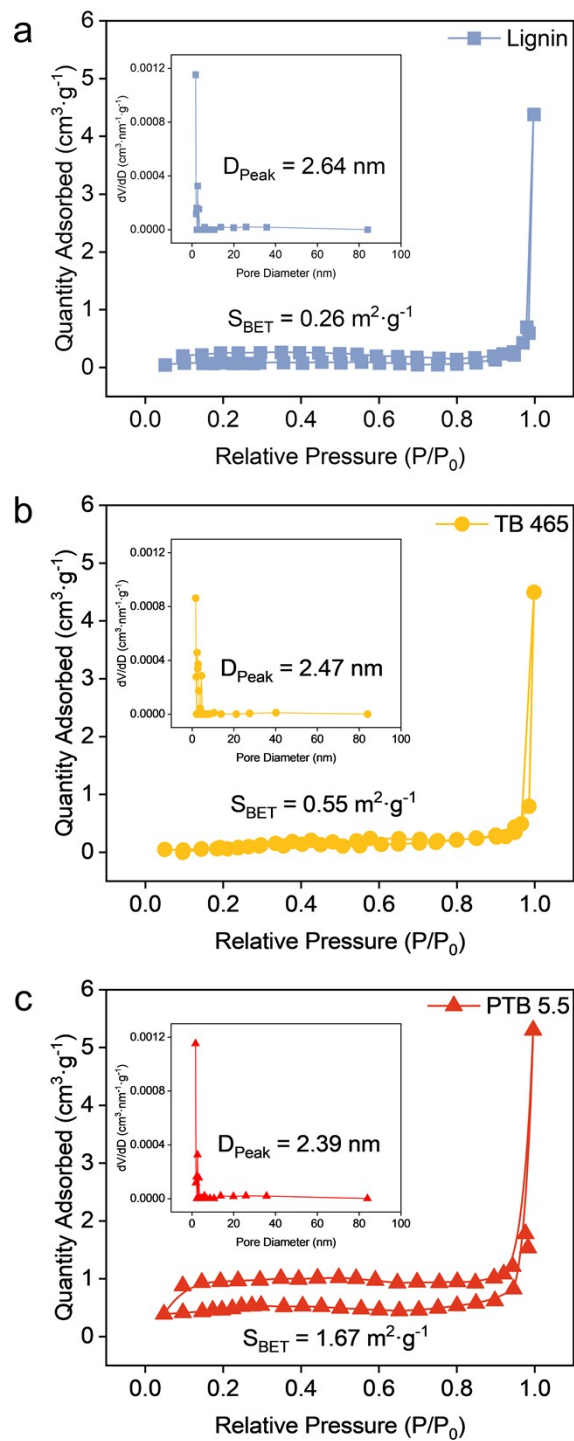

Figure S6. BET spectra of lignin, TB 465, and PTB 5.5 for specific surface area.

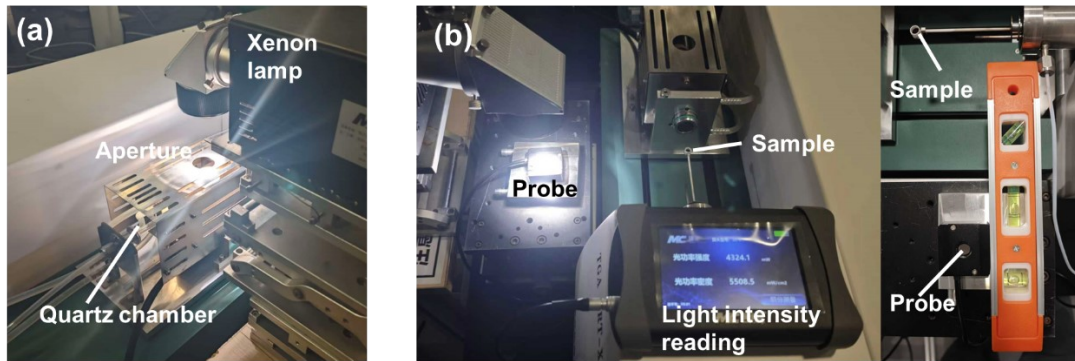

Figure S7. Digital photograph of the photo-TGA experiments.

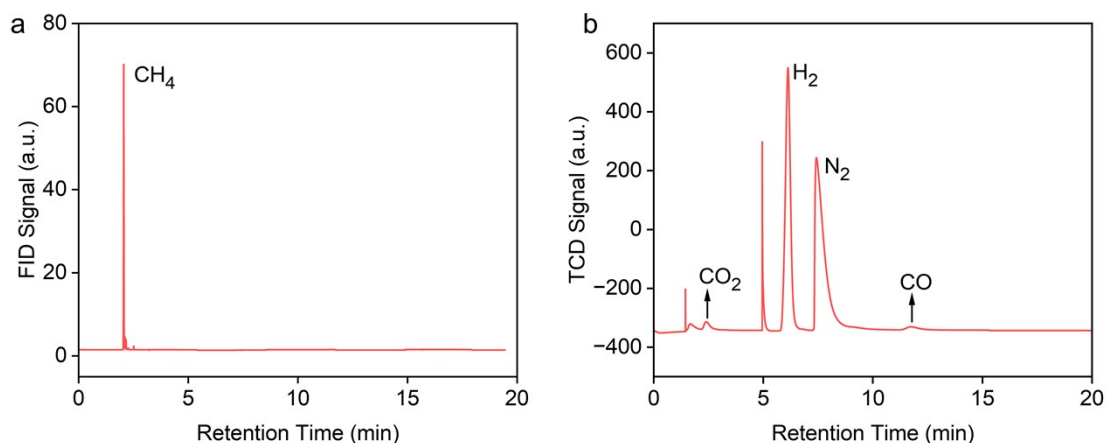

Figure S8. Gas chromatograms of gaseous products from lignin after 1 h irradiation at  $5.5 \text{ W}\cdot\text{cm}^{-2}$ , recorded using flame ionization detector (FID) (a) and thermal conductivity detector (TCD) (b). The injector temperature was set to  $220 \text{ }^\circ\text{C}$ . The temperatures of the FID and TCD were  $200 \text{ }^\circ\text{C}$  and  $70 \text{ }^\circ\text{C}$ , respectively. The oven temperature was maintained at  $70 \text{ }^\circ\text{C}$ , and the TCD current was  $70 \text{ mA}$ .
